# Supplementary material for: Exploring the phenotype of Italian patients with ALS with intermediate ATXN2 polyQ repeats
Source: PubMed Central journal article supplement (PMC9606535; doi:10.1136/jnnp-2022-329376), 2022-08-25
Supplement: jnnp-2022-329376supp001.pdf [file jnnp-2022-329376supp001.pdf]

**Supplementary Table 1.** Comparison of demographic and genotype data of ALS cases and controls

|                               | <b>ALS cases</b><br><b>n=1330</b> | <b>Controls</b><br><b>n=1274</b> | <b>P value</b> |
|-------------------------------|-----------------------------------|----------------------------------|----------------|
| Median age (IQR), years       | 68.4 (60.6-74.4)                  | 66.9 (59.0-71.8)                 | 0.15           |
| Sex (female, %)               | 590 (44.3%)                       | 590 (46.3%)                      | 0.32           |
| Median education (IQR), years | 8.0 (5.0-12.0)                    | 8.2 (4.9-12.2)                   | 0.32           |
| ATXN2 polyQ $\geq$ 31         | 42 (3.3%)                         | 4 (0.3%)                         | 0.0001         |

**Supplementary Table 2.** Comparison of demographic and genotype data of ALS cases according to the study cohorts

|                                              | <b>ALS cases –<br/>whole cohort<br/>(n=1330)</b> | <b>ALS cases-<br/>cognitive cohort<br/>(n=928)</b> | <b>p</b> |
|----------------------------------------------|--------------------------------------------------|----------------------------------------------------|----------|
| Age at onset (median, IQR)                   | 68.3 (60.4-74.4)                                 | 68.1 (60.3-73.9)                                   | 0.85     |
| Gender (female)                              | 590 (44.4%)                                      | 403 (43.4%)                                        | 0.66     |
| Site of onset (bulbar)                       | 400 (30.1%)                                      | 292 (31.5%)                                        | 0.48     |
| Diagnostic delay (months, IQR)               | 9.04 (5.10-13.97)                                | 9.04 (5.11-13.97)                                  | 0.94     |
| ALSFRS-R score at diagnosis (median, IQR)    | 42 (37-45)                                       | 42 (38-45)                                         | 0.43     |
| FVC% at diagnosis (median, IQW)              | 91 (72-104)                                      | 93 (74-106)                                        | 0.21     |
| $\Delta$ ALSFRS-R (median points/month, IQR) | 0.67 (0.33-1.34)                                 | 0.60 (0.30-1.18)                                   | 0.12     |
| $\Delta$ Weight (Kg/month, median, IQR)      | 0.28 (0-0.98)                                    | 0.25 (0-0.87)                                      | 0.37     |
| MiToS stage at diagnosis (0/1/2/3/4)         | 887/386/44/11/2                                  | 650/252/20/5/1                                     | 0.30     |
| King's state at diagnosis (1/2/3/4)          | 550/423/304/53                                   | 408/304/192/24                                     | 0.15     |
| $\Delta$ King's (median points/month, IQR)   | 0.20 (0.10-0.34)                                 | 0.19 (0.10-0.33)                                   | 0.28     |
| ATXN2 PolyQ (n, %)                           | 42 (3.2%)                                        | 25 (2.7%)                                          | 0.61     |

**Supplementary Table 3.** Median values (interquartile range) of age-, and education-corrected scores of cognitive tests in ALS patient according to ATXN2 status. 128 patients with FTD (7 ATXN2+ and 121 ATXN2-) have been excluded). P values are calculated with the Mann-Whitney U test.

| Test          | ATXN-<br>(n=903)          | ATXN+<br>(n=25)           | p            |
|---------------|---------------------------|---------------------------|--------------|
| MMSE          | 27.5 (26.2-29.5)<br>n=903 | 28.2 (26.9-30)<br>n=25    | 0.30         |
| FAS           | 28.8 (22.4-35.9)<br>n=836 | 28.7 (22.4-40.8)<br>n=22  | 0.68         |
| CAT           | 19.3 (15.5-22.0)<br>n=836 | 18.8 (16.0-25.8)<br>n=22  | 0.51         |
| FAB           | 14.9 (13.2-16.5)<br>n=778 | 15.2 (13.5-17.8)<br>n=22  | 0.50         |
| Digit Span FW | 5.7 (5.0-6.3)<br>n=789    | 5.6 (4.9-6.4)<br>n=19     | 0.79         |
| Digit Span BW | 3.9 (3.4-4.5)<br>n=789    | 4.3 (2.6-4.7)<br>n=19     | 0.78         |
| TMT A         | 39 (25-61)<br>n=781       | 40 (26-76)<br>n=18        | 0.73         |
| TMT B         | 81 (39-174)<br>n=781      | 74 (43-307)<br>n=18       | 0.74         |
| TMT B-A       | 44 (12-115)<br>n=781      | 52 (12-1735)<br>n=18      | 0.73         |
| RAVL-IR       | 39.2 (32.9-45.5)<br>n=569 | 37.0 (34.1 -39.1)<br>n=14 | 0.18         |
| RAVL-DR       | 6.0 (4.0-9.0)<br>n=569    | 3.0 (2.0-6.0)<br>n=14     | <b>0.023</b> |
| BSRT-IR       | 5.6 (4.5-6.8)<br>n=543    | 4.6 (3.5-5.4)<br>n=14     | <b>0.044</b> |
| BRRT-DR       | 6.5 (5.0-7.5)<br>n=543    | 5.4 (4.3-7.2)<br>n=14     | 0.07         |
| ROCF-IR       | 31.5 (26.3-34.3)<br>n=676 | 31.9 (27.4-34.3)<br>N=15  | 0.95         |

|                |                           |                          |             |
|----------------|---------------------------|--------------------------|-------------|
| <b>ROCF-DR</b> | 11.7 (7.7-16.4)<br>n=676  | 12.2 (6.9-16.8)<br>n=15  | 0.31        |
| <b>CPM47</b>   | 28.5 (24.2-31.5)<br>n=823 | 30.0 (26.5-33.0)<br>n=15 | 0.20        |
| <b>Clock</b>   | 4 (3-5)<br>n=755          | 4 (3-5)<br>n=22          | 0.78        |
| <b>SET-IA</b>  | 4.2 (3.2-5.3)<br>n=150    | 3.2 (1.5-5.0)<br>n=6     | 0.30        |
| <b>SET-CI</b>  | 4.3 (3.3-5.2)<br>n=150    | 4.7 (2.6-6.0)<br>n=6     | 0.75        |
| <b>SET-EA</b>  | 4.2 (3.2-5.9)<br>n=150    | 3.3 (2.5-4.0)<br>n=6     | 0.18        |
| <b>SET-GS</b>  | 13.1 (9.3-15.3)<br>n=150  | 10.4 (6.6-14.8)<br>n=6   | 0.38        |
| <b>HADS-A</b>  | 7 (5-10)<br>n=795         | 10 (2-14)<br>n=16        | 0.43        |
| <b>HADS-D</b>  | 5 (3-8)<br>n=795          | 9 (3.8-11)<br>n=16       | <b>0.04</b> |

\* The scores of the Clock test are not corrected by age and education because no Italian normative data are available

MMSE, Mini-Mental State Examination; FAS, Letter Fluency test; CAT, Category Fluency Test; FAB, Frontal Assessment Battery; Digit Span FW, Digit Span Forward; Digit Span BW, Digit Span Backward; TMT A, Trail Making Test A; TMT B, Trail Making Test B; TMT B-A, Trail Making Test B-A; RAVL-IR, Rey Auditory Verbal Learning Test, Immediate Recall; RAVL-DR, Rey Auditory Verbal Learning Test, Delayed Recall; BSRT-IR, Babcock Story Recall Test, Immediate Recall; BSRT-DR, Babcock Story Recall Test, Delayed Recall ; ROCF-IR, Babcock Story Recall Test, Immediate Recall ; ROCF-DR, Babcock Story Recall Test, Delayed Recall ; CPM47, Raven's Colored Progressive Matrices; Clock, Clock Drawing Test; SET-IA, Story-Based Empathy Task – Intention Attribution; SET-CI, Story-Based Empathy Task – Causal Inference; SET-EA, Story-Based Empathy Task – Emotion Attribution; SET-GS, Story-Based Empathy Task – Global Score; HADS-A, Hospital Anxiety and Depression Scale - Anxiety; HADS-D, Hospital Anxiety and Depression Scale - Depression

**Supplementary Table 4.** Median values (interquartile range) of age-, and education-corrected scores of ECAS in ALS patient according to ATXN2 status. Patients with FTD have been excluded. P values are calculated with the Mann-Whitney U test.

| <b>Domains</b>                    | <b>ATXN2-<br/>(n=291)</b> | <b>ATXN2+<br/>(n=6)</b> | <b>p</b>     |
|-----------------------------------|---------------------------|-------------------------|--------------|
| <b>Language</b>                   | 25 (22-27)                | 25.5 (24.2-27.5)        | 0.44         |
| <b>Fluency</b>                    | 16 (12-18)                | 15 (14-17.5)            | 0.92         |
| <b>Executive</b>                  | 30 (22-38)                | 20.5 (20-24)            | <b>0.034</b> |
| <b>Memory</b>                     | 17 (14-19)                | 14.5 (13.2-16.5)        | 0.061        |
| <b>Visuospatial</b>               | 12 (11-12)                | 11.5 (9.5-12)           | 0.67         |
| <b>ALS specific functions</b>     | 70.5 (57-79)              | 62 (60-66)              | 0.11         |
| <b>ALS non-specific functions</b> | 28 (25-31)                | 26 (23.5-27.5)          | 0.25         |
| <b>ECAS total score</b>           | 97 (82-110)               | 87.5 (84.8-93.3)        | 0.19         |

**Supplementary Table 5.** List of extracted genes

| <b>GENES</b>   |                  |                |                |
|----------------|------------------|----------------|----------------|
| <b>ALS2</b>    | <b>DCTN1</b>     | <b>NEK1</b>    | <b>SS18LL1</b> |
| <b>ANG</b>     | <b>DNAJC7</b>    | <b>OPTN</b>    | <b>SPTLC1</b>  |
| <b>ANXA11</b>  | <b>ERBB4</b>     | <b>PFN1</b>    | <b>SQSTM1</b>  |
| <b>ATXN2</b>   | <b>ESWR1</b>     | <b>PON1</b>    | <b>TAF15</b>   |
| <b>C21orf2</b> | <b>FIG4</b>      | <b>PON2</b>    | <b>TARDBP</b>  |
| <b>C9orf72</b> | <b>FUS</b>       | <b>PRPH</b>    | <b>TBK1</b>    |
| <b>CAMTA1</b>  | <b>HNRNPA1</b>   | <b>PGRN</b>    | <b>TUBA4A</b>  |
| <b>CCNF</b>    | <b>HNRNPA2B1</b> | <b>SETX</b>    | <b>UBQLN2</b>  |
| <b>CEP112</b>  | <b>KIF5A</b>     | <b>SIGMAR1</b> | <b>UNC13A</b>  |
| <b>CHCHD10</b> | <b>MAPT</b>      | <b>SOD1</b>    | <b>VAPB</b>    |
| <b>CHMP2B</b>  | <b>MATR3</b>     | <b>SPAST</b>   | <b>VCP</b>     |
| <b>DAO</b>     | <b>NEFH</b>      | <b>SPG11</b>   |                |

**Supplementary Table 6.** Allele frequencies and predicted functional effects of identified genetic variants

| Gene         | ExonicFunc           | AChange.refGene         | dbSNP       | ExAC<br>freq | gnomAD<br>exome<br>NFE | SIFT | Polyphen2<br>HVAR | LRT | MutationTaster | FATHMM | MetaSVM | MetaLR | CADD  |
|--------------|----------------------|-------------------------|-------------|--------------|------------------------|------|-------------------|-----|----------------|--------|---------|--------|-------|
| <i>CCNF</i>  | nonsynonymous<br>SNV | exon5:c.G368A;p.R123H   | rs371699142 | 4.24E-05     | 4.52E-05               | T    | P                 | D   | D              | T      | T       | T      | 25.1  |
| <i>DCTN1</i> | nonsynonymous<br>SNV | exon11:c.C1061T;p.A354V | .           | .            | .                      | D    | P                 | D   | D              | T      | D       | D      | 28.4  |
| <i>EWSR1</i> | nonsynonymous<br>SNV | exon5:c.G394T;p.A132S   | .           | .            | .                      | T    | B                 | U   | D              | T      | T       | T      | 24.2  |
| <i>OPTN</i>  | nonsynonymous<br>SNV | exon3:c.T332G;p.L111R   | .           | .            | .                      | D    | B                 | N   | D              | D      | D       | D      | 26.4  |
| <i>SETX</i>  | nonsynonymous<br>SNV | exon10:c.A1427G;p.H476R | rs779742691 | 8.53E-06     | 9.34E-06               | D    | D                 | D   | D              | D      | D       | D      | 24.8  |
| <i>SETX</i>  | nonsynonymous<br>SNV | exon10:c.G2755A;p.V919I | .           | .            | 0                      | D    | B                 | N   | N              | D      | T       | T      | 10.35 |

SIFT: D, Deleterious; T, tolerated; PolyPhen-2: D, Damaging; P, Possibly Damaging; B, Benign; LRT: D, Deleterious; N, neutral; U, Unknown; Mutation Taster, D, Deleterious; N, Neutral; FATHMM: D, Deleterious; T, Tolerated; MetaSVM: D, Deleterious; T, Tolerated; MetaLR: D, Deleterious; T, Tolerated

**Supplementary Table 7.** Demographic and clinical characteristics of patients with  $\geq 31$  *ATXN2* PolyQ intermediate number of repeats according to the presence of mutations in other genes

|                                              | <b>With other gene mutations (n=6)</b> | <b>Without other gene mutations (n=34)</b> | <b>p</b> |
|----------------------------------------------|----------------------------------------|--------------------------------------------|----------|
| Age at onset (median, IQR)                   | 71.5 (65.5-77.9)                       | 68.3 (62.9-75.8)                           | 0.52     |
| Gender (female)                              | 2 (33.3%)                              | 12 (35.3%)                                 | 0.65     |
| Site of onset (bulbar)                       | 1 (14.7%)                              | 5 (16.7%)                                  | 0.65     |
| Diagnostic delay (months, IQR)               | 5.7 (2.5-10.5)                         | 6.0 (3.9-9.9)                              | 0.62     |
| ALSFRS-R score at diagnosis (median, IQR)    | 40 (30-45)                             | 42 (35-44)                                 | 0.96     |
| $\Delta$ ALSFRS-R (median points/month, IQR) | 1.37 (0.55-4.41)                       | 1.00 (0.49-1.85)                           | 0.45     |
| FVC% at diagnosis (median, IQR) *            | 77 (51-98)                             | 89 (79-106)                                | 0.19     |
| $\Delta$ Weight (Kg/month, median, IQR) §    | 1.94 (0.4-3.10)                        | 0.29 (0-1.03)                              | 0.026    |
| MiToS stage at diagnosis (0/1/2/3/4)         | 5/0/1/0                                | 21/11/1/1                                  | 0.22     |
| King's state at diagnosis (1/2/3/4)          | 2/1/2/1                                | 12/12/8/2                                  | 0.67     |
| $\Delta$ King's (median points/month, IQR)   | 0.49 (0.19-1.10)                       | 0.25 (0.17-0.51)                           | 0.31     |
| ALS-FTD ^                                    | 1 (33.3%)                              | 5 (23.8%)                                  | 0.037    |



|                              |                  |                  |      |
|------------------------------|------------------|------------------|------|
| Median survival (years, IQR) | 1.08 (0.84-2.26) | 1.82 (1.25-2.59) | 0.30 |
|------------------------------|------------------|------------------|------|

\* available for 36 patients (5 with other mutations and 31 without other mutations)

§ available for 38 patients (6 with other mutations and 32 without other mutations)

^ available for 24 patients (3 with other mutations and 21 without other mutations)
